# Supplementary material for: Circulation of HIV-1 CRF02_AG among MSM Population in Central Italy: A Molecular Epidemiology-Based Study
Source: Hindawi journal article supplement (doi:10.1155/2013/810617), 2013-01-01
Supplement: f1 [file 810617.f1.pdf]

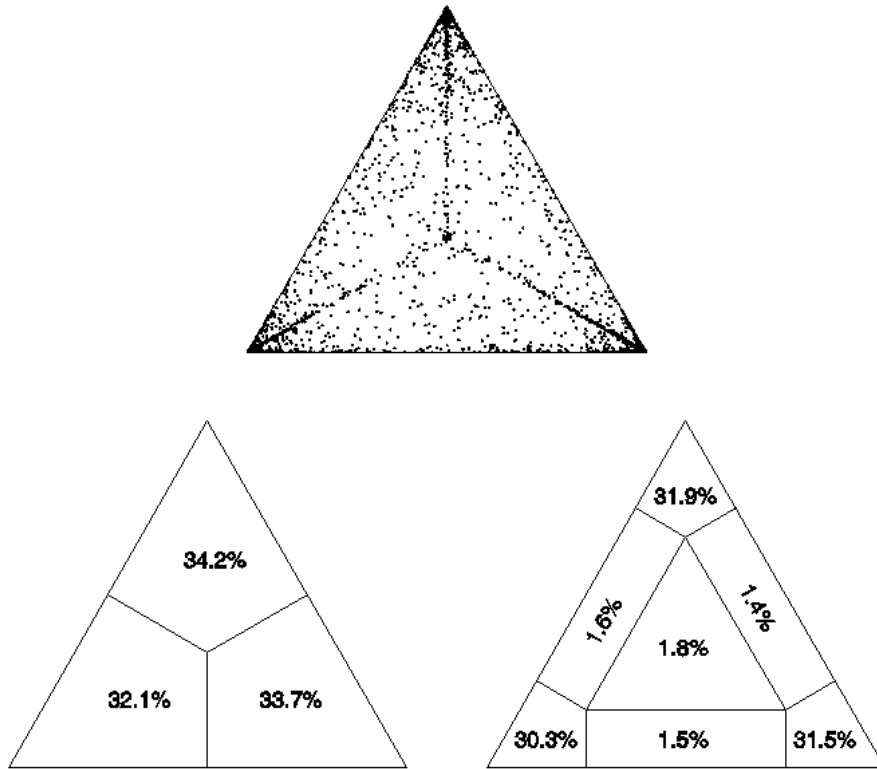

**Supplementary Figure 1.** Likelihood mapping of 55 HIV-1 CRF 02\_ AG *pol* sequences from MSM . The dots inside the triangles represent the posterior probabilities of the possible unrooted topologies for each quartet. Numbers indicate the percentage of dots in the centre of the triangle corresponding to phylogenetic noise (star-like trees).
